1 **MULTI-OMICS TEMPORAL PROFILING OF AXIAL SPONDYLOARTHRITIS PATIENTS**  
2 **REVEALS AN ASSOCIATION OF THERAPEUTIC RESPONSE TO ADALIMUMAB WITH**  
3 **DISEASE ACTIVITY AND INNATE / ADAPTIVE IMMUNITY**

4 Daniel Sobral<sup>1,2</sup>, Ana F Fernandes<sup>3</sup>, Atlas Sardoo<sup>4</sup>, Miguel Bernardes<sup>5,6</sup>, Patrícia Pinto<sup>7</sup>, Helena  
5 Santos<sup>4,8</sup>, João Lagoas-Gomes<sup>9</sup>, José Tavares-Costa<sup>10</sup>, José AP Silva<sup>11,12</sup>, João M Dias<sup>4,13</sup>,  
6 Alexandra Bernardo<sup>6</sup>, Jean-Charles Gaillard<sup>14</sup>, Jean Armengaud<sup>14</sup>, Vladimir Benes<sup>15</sup>, Lúcia  
7 Domingues<sup>4,16</sup>, Nélia Gouveia<sup>4,17</sup>, Sara Maia<sup>4,17</sup>, Jaime C Branco<sup>4,18</sup>, Ana V Coelho<sup>3</sup>, Fernando  
8 M Pimentel-Santos<sup>4,18,\*</sup>

9 <sup>1</sup> Associate Laboratory i4HB - Institute for Health and Bioeconomy, NOVA School of Science  
10 and Technology, NOVA University Lisbon, 2819-516 Caparica, Portugal

11 <sup>2</sup> UCIBIO – Applied Molecular Biosciences Unit, Department of Life Sciences, NOVA School of  
12 Science and Technology, NOVA University Lisbon, 2819-516 Caparica, Portugal

13 <sup>3</sup> Instituto de Tecnologia Química e Biológica António Xavier, Universidade Nova de Lisboa, Av.  
14 da República, 2780-157 Oeiras, Portugal

15 <sup>4</sup> CEDOC, FCM|Nova Medical School, Universidade NOVA de Lisboa, Lisboa, Portugal

16 <sup>5</sup> Department of Medicine, Faculty of Medicine, University of Porto, Porto, Portugal

17 <sup>6</sup> Rheumatology Department, Centro Hospitalar e Universitário de São João, Porto, Portugal

18 <sup>7</sup> Rheumatology Department, Hospital Centre of Vila nova de Gaia espinho, Vila nova de Gaia,  
19 Porto, Portugal

20 <sup>8</sup> Portuguese Institute of Rheumatology, Lisboa, Portugal

21 <sup>9</sup> Rheumatology Department, Centro Hospitalar do Tâmega e Sousa, Hospital Padre Américo,  
22 Penafiel, Portugal

23 <sup>10</sup> Rheumatology Department, Unidade Local de Saúde do Alto Minho, Ponte de Lima, Portugal

24 <sup>11</sup> i.CBR – Institute for Clinical and Biomedical Research, Faculty of Medicine, University of  
25 Coimbra, Portugal.

26 <sup>12</sup> Rheumatology Department, Centro Hospitalar e Universitário de Coimbra, Portugal.

27 <sup>13</sup> Rheumatology Department, Centro Hospitalar Médio Tejo, Torres Novas, Portugal

28 <sup>14</sup> Université Paris-Saclay, CEA, INRAE, Département Médicaments et Technologies pour la  
29 Santé (DMTS), SPI, 30200 Bagnols sur Cèze, France

30 <sup>15</sup> EMBL Genomics Core Facility, Meyerhofstr. 1, D-69117 Heidelberg

31 <sup>16</sup> Escola Superior de Saúde – Instituto Politécnico de Setúbal, Setúbal, Portugal

32 <sup>17</sup> NOVA Clinical Research Unit of Universidade Nova de Lisboa, Lisboa, Portugal

33 <sup>18</sup> Rheumatology Department, CHLO, Hospital de Egas Moniz, Lisboa, Portugal

34 \* Corresponding author: [pimentel.santos@nms.unl.pt](mailto:pimentel.santos@nms.unl.pt)

35

## 36 **ABSTRACT**

37 **Background:** Axial Spondyloarthritis can lead to significant disability and impairment in quality  
38 of life. TNF inhibitors are recommended to patients enduring active disease despite  
39 conventional treatment. Nonetheless, up to 40% of patients of patients fail to respond to TNF  
40 inhibitors. In this context, it is important to identify as early as possible patients highly likely to  
41 respond. This study aims at identifying, among axial spondyloarthritis patients undergoing  
42 treatment with the TNF inhibitor adalimumab, early molecular biomarkers differentiating good  
43 responders from non-responders after 14 weeks of treatment, as measured by ASAS20.

44 **Methods:** Peripheral blood RNA sequencing and serum proteins measured by mass  
45 spectrometry were evaluated in a cohort of biologic naïve axial spondyloarthritis patients (n =  
46 35), before (baseline) and after (3-5 days, 2 weeks and 14 weeks) treatment with adalimumab.  
47 Results from differential expression analysis were used in combination with clinical data to build  
48 logistic regression models and random forest models to predict response to adalimumab at  
49 baseline.

50 **Results:** Responders to adalimumab presented higher levels of markers of innate immunity at  
51 baseline, mostly related with neutrophils, and lower levels of adaptive immunity markers,  
52 particularly B-cells. A logistic regression model incorporating ASDAS-CRP and AFF3, the top  
53 differentially expressed gene between responders and non-responders at baseline, enabled an  
54 accurate prediction of response to adalimumab in our cohort (AUC=0.96), with random forest  
55 models suggesting 80% predictive accuracy. A treatment-associated signature suggests a  
56 reduction in inflammatory activity, with C-reactive protein and Haptoglobin showing strong and  
57 early decrease in the serum of axial spondyloarthritis patients, while a cluster of apolipoproteins  
58 showed increased expression at week 14.

59 **Conclusions:** Differences in disease activity and/or blood innate/adaptive immune cell type  
60 composition at baseline may be a major contributor to response to adalimumab in axial  
61 spondyloarthritis, where a model including clinical and blood gene expression variables shows  
62 high predictive power. Our results suggest novel molecular biomarkers of response to  
63 adalimumab at baseline.

64 **Trial registration:** Axial spondyloarthritis patients were selected from participants of the  
65 Bioefficacy study - Biomarkers Identification of Anti-TNF $\alpha$  Agent's Efficacy in Ankylosing

66 Spondylitis Patients Using a Transcriptome Analysis and Mass Spectrometry (clinical trials.gov  
67 identifier NCT02492217).

68 **Keywords:** Axial spondyloarthritis, TNF inhibitor, Adalimumab, Treatment response, Disease  
69 activity, Innate immune system, Adaptive immune system, Peripheral blood, RNA sequencing,  
70 Proteomics.

71

## 72 **BACKGROUND**

73 Axial Spondyloarthritis (axSpA) can lead to significant disability and impairment in quality of life  
74 [1]. Inflammatory back pain is a characteristic symptom, and new bone formation with  
75 syndesmophytes and ankylosis are the disease radiographic hallmarks. Clinical features of  
76 axSpA are heterogeneous, including inflammatory back pain, asymmetrical peripheral  
77 oligoarthritis (predominantly of the lower limbs), enthesitis, and specific organ involvement such  
78 as acute anterior uveitis, psoriasis, and chronic inflammatory bowel disease. Pulmonary, renal,  
79 neurological, aortic root involvement and conduction abnormalities are all rare complications of  
80 axSpA [2].

81 In axSpA, non-steroidal anti-inflammatory drugs (NSAIDs) have a central role in treatment and  
82 are considered the first-choice drug treatment. However, biological disease-modifying  
83 antirheumatic drugs (bDMARDs) including TNF inhibitors (TNFi), are recommended to patients  
84 enduring active disease despite conventional treatment (or intolerance/contraindication) [3]. The  
85 efficacy of TNFi has been documented in several studies showing significant and early  
86 improvements in disease activity and function [4] sustainable for long periods of time [5]. In spite  
87 of its well documented benefit in axSpA, up to an estimated 40% axSpA patients fail to respond  
88 to TNFi treatment [6] or complain with adverse events [7].

89 The concept of “window of opportunity” is of critical importance in rheumatoid arthritis (RA) [8]  
90 and seems to be also relevant in the axSpa context, with studies of magnetic resonance

91 imaging in the context of TNFi treatment suggesting that early effective suppression of  
92 inflammation has the potential to reduce radiographic damage [9]. Patients that fail to respond  
93 to the first bDMARD usually switch to another bDMARD (with the same or other mechanism of  
94 action, such as IL-17 inhibitors [10]), and it may take several iterations to find a drug that  
95 reduces disease activity [3]. Response to an effective therapy can take several weeks/months,  
96 and the delay caused by non-response may imply irreversible damage. In this context, it is  
97 important to identify as early as possible the patients highly likely to respond, meaning to  
98 achieve remission or low disease activity, following the treat to target concept [11].

99 Studies specifically in axSpA indicate that primary non-responders to TNFi tend to be older,  
100 HLA-B27 negative, with longer disease duration (> 20 years), higher structural damage and  
101 poor function [12]. Likewise, good response to therapy was associated with younger age, HLA-  
102 B27 carriage, short disease duration (<10 years), elevation of acute phase reactants (CRP), and  
103 marked spinal inflammation (detectable by MRI) [13]. Higher levels of CRP is the most common  
104 marker associated with good response, but higher levels of other inflammation markers such as  
105 IL6 [14] and calprotectin [15] have also been associated with positive outcomes of TNFi  
106 treatment.

107 The molecular characterization of anti-TNF response in axSpA revealed the unsurprising  
108 involvement of genes related with immunity and inflammation [16,17]. Although several studies  
109 address the overall effect of TNFi treatment in the axSpA context [18], very few specifically  
110 address the molecular changes associated with response/non-response to anti-TNF treatment  
111 in axSpA, most of them focusing on specific markers of inflammation in the sera of a limited set  
112 of patients. In particular, no study systematically assessed large scale transcriptomics and/or  
113 proteomics data to find early predictors of response to anti-TNF in axSpA. On the other hand,  
114 several studies have tried to develop such predictors in RA, with variable success [19–21]. One  
115 study using whole blood transcriptomics achieved 65% accuracy of response to infliximab in RA

116 with a 10-gene biomarker set [19]. In another study using transcriptomics of monocytes, CD11c  
117 was found to be a very good predictor of response (95% accuracy) to adalimumab monotherapy  
118 in RA [20]. Thomson and colleagues used publicly available data to develop a model including  
119 18 signaling mechanisms that could increase the capacity to discover non-responders, from  
120 27% to 59% [21]. More recently, several studies suggested an interplay between innate and  
121 adaptive immunity, with a higher myeloid-driven inflammation in responders and higher  
122 lymphoid activity in non-responders [21–23].

123 Reliable predictors of outcome for anti-TNF monotherapies in axSpA are currently not yet  
124 available. The goal of this study is thus the identification of baseline predictors, using  
125 transcriptomic and proteomic approaches, of patient response to anti-TNF therapy  
126 (adalimumab) in axSpA using peripheral blood samples, which are particularly appealing given  
127 the relative ease of obtaining samples as part of patient follow-up.

128

## 129 **METHODS**

### 130 **Study design and samples collection**

131 AxSpa patients were selected from participants of the Bioefficacy study - Biomarkers  
132 Identification of Anti-TNF $\alpha$  Agent's Efficacy in Ankylosing Spondylitis Patients Using a  
133 Transcriptome Analysis and Mass Spectrometry (clinical trials.gov identifier NCT02492217).  
134 This is a multicentric, prospective, nonrandomized, 14-weeks study that includes axSpA adult  
135 patients according to axSpA ASAS criteria [24]. The study included biologic naïve patients,  
136 starting TNFi therapy with adalimumab (40mg subcutaneously fortnightly), according to the  
137 Portuguese Society of Rheumatology Guidelines [25] (see supplementary material). Clinical  
138 evaluations and peripheral blood collections were performed at baseline (start bDMARD), and

139 after 3-5 days, 2 weeks and 14 weeks. Patients were classified as responders and non-  
140 responders, according to ASAS20 [26,27] at week 14. To have 80% power to detect a 0.5SD  
141 difference between groups at  $p=0.05$  (paired t-test), we estimated that we would need samples  
142 from 18 responders and 18 non-responders. Usually only 60% of patients after starting TNFi  
143 reach ASAS20, which means that we would need to include a larger number of patients to  
144 establish the subgroups for analysis. Thus, we included the number of patients necessary to  
145 ensure 18 non-responders, after which we closed the recruitment period. All clinical evaluations  
146 were performed by previously trained rheumatologists. Blood samples were collected from all  
147 subjects at baseline to test for HLA-B27 status and at each timepoint to determine C-reactive  
148 protein (CRP), Erythrocyte Sedimentation Rate (ESR), other biochemical parameters and for  
149 RNA-seq and serum proteomic analysis.

#### 150 **RNA preparation and NGS sequencing (RNA-seq)**

151 Peripheral blood samples were collected into PAXgene Blood RNA System® tubes and stored  
152 at  $-80^{\circ}\text{C}$  according to the manufacturer's recommendations [28]. Total RNA was extracted from  
153 whole blood samples according to the standard PAXgene protocol (Qiagen, 2008). The quantity  
154 of RNA was measured using a NanoDrop 2000/2000c Spectrophotometer according to the  
155 manufacturer's procedure (Thermo-Scientific, 2000); RNAs with a 260:280 ratio of  $\geq 1.5$  were  
156 sequenced as below. The quality and quantity of the libraries was assessed by Fragment  
157 Analyzer with the method of DNF-474-22 - HS NGS Fragment 1-6000bp (Agilent). Sequencing  
158 library preparation was performed using Illumina TruSeq stranded mRNA library preparation  
159 kits, with 100ng of total RNA as input. Libraries were sequenced on an Illumina NextSeq500  
160 sequencer (average of 39 million reads per sample, 75 base-pair paired-end). Sample  
161 correspondence between timepoints was confirmed using SmaSH [29]. We also used the  
162 transcriptomic data to confirm gender and HLA-B27 status.

## 163 **RNA-Seq data analysis**

164 Raw sequencing reads were aligned to gencode (v32) transcripts using kallisto (version 0.46.1)  
165 [43], reaching an average of 86% reads assigned to genes (gene counts are in Supp. Table 11).  
166 The edgeR R package was used to filter low-expressed genes with the filterByExpr function and  
167 to normalize raw counts with the trimmed mean of M-values (TMM) normalization approach [44].  
168 The limma R package was used to apply a voom transformation for variance stabilization [45],  
169 and to obtain differentially expressed genes through an empirical bayes approach. Genes were  
170 considered differentially expressed if the adjusted p-value of the test was less than 0.05.  
171 Functional enrichment analysis was performed using the fgsea R package, based on ranks of  
172 the moderated t-statistic from the empirical bayes analysis. The per-gene variance explained by  
173 each variable was estimated using the variancePartition R package. Permutational multivariate  
174 analysis of variance (adonis) was performed using the vegan R package.

## 175 **Inference of Immune cell populations from RNA-Seq data**

176 The hemograms collected in each timepoint were used to correlate with data obtained from  
177 transcriptomic analysis. As common hemograms did not provide specific information on B-cells  
178 and other more specific cell types, we used Cibersort [30] to infer relative frequencies of  
179 immune cell populations by comparing normalized  $\log_2(\text{counts per million})$  of the blood  
180 transcriptomes to the Abbas et al. signatures [31]. To assess the accuracy of these  
181 measurements, we correlated the relative frequencies obtained with RNA-Seq with the values  
182 we obtained with clinical hemograms (Supplemental Figure 8A,B, pearson  $R=0.84$  and  $p=3.3e-8$   
183 for Neutrophils,  $R=0.86$  and  $p=1.2e-8$  for Lymphocytes). For consistency, we used only  
184 frequencies from Cibersort estimated values in the analyses for Fig4C and Fig2D, and in logistic  
185 regression models. In Supp. Fig. 8C,D we used exclusively hemogram data, and in Supp. Fig.  
186 8E.F we used frequencies estimated with Cibersort confirming the same conclusions.



187 Quantitative set analysis for gene expression (QUSAGE) [32] was used to assess the fold  
188 change of immune signature gene sets from Lewis et al. [33] (Supp. Fig. 7A).

### 189 **Proteomics Analysis (LC-MS/MS)**

190 **Immunoaffinity depletion of high-abundance proteins.** Peripheral blood samples were  
191 collected into Clot Activator Tubes (Monovette Serum Gel Z- 7.5 mL, Sarsted) containing 100  $\mu$ L  
192 of Protease Inhibitor Cocktail (Sigma-Aldrich). The six most abundant proteins in serum were  
193 depleted using the Multiple Affinity Removal Spin Cartridge Human 6 Kit (Agilent  
194 Technologies®) following manufacturer's instructions. The remaining proteins were  
195 concentrated using 4 mL Spin Concentrators with 5000 MWCO (Agilent Technologies®). A  
196 centrifugation was performed (with a fixed angle rotor) at 4000 x g and 10°C until the sample  
197 reached a volume between 100 and 140  $\mu$ L, after which it was recovered from the bottom of the  
198 concentrator pocket and stored at -20°C until further analysis. In order to quantify the amount of  
199 protein in each sample, the QuantiPro™ BCA Kit (Sigma-Aldrich®) was used.

200 **In-gel protein digestion.** 50  $\mu$ g of total proteins was diluted with MilliQ water to a final volume of  
201 20  $\mu$ L and 10  $\mu$ L of LDS3X (Invitrogen™ by Life Technologies™) was added, for a final volume  
202 of 30  $\mu$ L. Samples were heated for 5 min at 99°C and briefly centrifuged (16,000 g for 1 min).  
203 The whole volume of the supernatant containing the soluble proteins was loaded on a NuPAGE  
204 4-12% Bis-Tris (Invitrogen™ by Life Technologies™) gel and the proteins were subjected to  
205 SDS-PAGE electrophoresis for 5 min. After migration, the gels were stained with Coomassie  
206 SimplyBlue SafeStain (Invitrogen™ by Life Technologies™) for 5 min and washed with water  
207 overnight with gentle agitation. Polyacrylamide bands containing the stained proteome were cut  
208 by the limit of gel wells, between the front of migration and the well bottom. Each sample was  
209 treated and proteolyzed with trypsin Gold (Promega©) in presence of ProteaseMax detergent  
210 (Promega©) as previously described [46]. The final volume of peptide extract was 50  $\mu$ L.



211 **LC-MS/MS analysis.** Tryptic peptides were analyzed with a Q-Exactive™ HF high resolution  
212 tandem mass spectrometer (ThermoFisher Scientific™) incorporating an ultra-high-field Orbitrap  
213 analyser as previously described [34]. Shortly, 10 µL of the resulting peptide mixtures for each  
214 sample were injected in a random order. First, peptides were desalted online on a reverse  
215 phase precolumn Acclaim PepMap 100 C18 (5 µm, 100 Å, 300 µm id x 5 mm), and then, they  
216 were resolved on a reverse phase column Acclaim PepMap 100 C18 (3 µm, 100 Å, 75 µm id x  
217 500 mm) at a flow rate of 200 nL/min with a 90 min gradient of 4 to 25 % of B in 75 min and 25  
218 to 40% of B in 15 min (being A: 0.1% HCOOH and B: 80% CH<sub>3</sub>CN, 0.1% HCOOH). The Q-  
219 Exactive HF instrument was operated according to a Top20 data-dependent method consisting  
220 in a scan cycle initiated with a full scan of peptide ions in the ultra-high-field Orbitrap analyzer,  
221 followed by serial selection of each of the 20 most abundant precursor ions, high energy  
222 collisional dissociation and MS/MS scans. Full scan mass spectra were acquired from m/z 350  
223 to 1,500 with a resolution of 60,000. A peptide exclusion list was established for the most  
224 abundant immunodepleted proteins: serum albumin (<https://www.uniprot.org/uniprot/P02768>)  
225 complement C3 (P01024), alpha-2-macroglobulin (P01023), and apolipoprotein B-100  
226 (P04114), in order to focus the analysis on the other proteins. Each MS/MS scan was acquired  
227 with a threshold intensity of 83.000, on potential charge states of 2+ and 3+ after ion selection  
228 performed with a dynamic exclusion of 10 sec, maximum Inclusion Time (IT) of 60 ms and an  
229 m/z isolation window of 2.0. MS/MS spectra at a resolution of 15.000 were searched using  
230 MASCOT 2.5.1 software (Matrix Science) against the Swissprot Human database downloaded  
231 in July 2019 (20.432 Homo sapiens protein sequences). The following parameters were used  
232 for MS/MS spectra assignation: full trypsin specificity, maximum of two missed cleavages, mass  
233 tolerances of 5 ppm on the parent ion and 0.02 Da on the secondary ions, fixed modification of  
234 carbamidomethyl cysteine (+57.0215), and oxidized methionine (+15.9949) and deamidated  
235 (NQ) (0.9840) as dynamic modifications.

236 **Protein identification and relative quantification.** After LC-MS/MS, a bioinformatic analysis  
237 was performed where all peptide matches with a MASCOT peptide score below a query identity  
238 threshold p-value of 0.05 were filtered and assigned to proteins. A total of 5.453.298 MS/MS  
239 spectra were recorded and 1.632.427 spectra were assigned to peptide sequences from the  
240 protein database – these peptide spectral matches are listed in Supp. Table 12. A protein  
241 identification was considered valid when at least two different non-ambiguous peptides were  
242 detected in the whole dataset. False discovery rate (FDR) for proteins was below 1% when  
243 applying these rules with the MASCOT decoy search mode. A total of 333 polypeptide  
244 sequences were identified based on at least 2 non-ambiguous peptides – from the initially 377  
245 polypeptide sequences identified, 44 contaminant proteins (keratin and keratin associated  
246 proteins) were excluded from further analysis. For each validated protein (listed in Supp. Table  
247 12), the number of MS/MS spectra for all detected non-ambiguous peptides or ‘Spectral Count’  
248 (SC) [47] was used as a proxy of their abundances [48]. To further assess the value of SC as a  
249 measure of protein abundance, we compared clinically determined CRP levels with CRP levels  
250 measured by proteomics, and found these to be highly correlated (Supp. Fig. 9, pearson  
251  $R=0.73$ , spearman  $\rho=0.79$ ,  $p<2e-16$ ). Differential protein analysis was performed similarly to  
252 the transcriptomics, using the SC values as counts.

253

## 254 **Data analysis**

255 Descriptive statistics were used to summarize baseline characteristics for responders and non-  
256 responders. Two sample Wilcoxon tests (continuous variables) and chi-square tests of  
257 association (categorical variables) were used to compare characteristics between responders  
258 and non-responders at different timepoints, in particular between baseline and week 14.

259 Differential gene and protein expression analysis used the limma R package to apply a voom  
260 transformation for variance stabilization on normalized expression values, and to obtain  
261 differentially expressed genes through an empirical bayes approach, followed by multiple test  
262 correction with the Benjamini-Hochberg method. Genes were considered differentially  
263 expressed if the adjusted  $p$ -value of the test was less than 0.05.

264 Logistic regression models, and plotting was performed using the R software. Sparse partial  
265 least squares discriminant analysis (sPLS-DA) was performed using the mixOmics R package.  
266 Random forest models were obtained using the randomForest R package.

267

## 268 **RESULTS**

### 269 **The TNF inhibitor adalimumab induced a reduction in disease activity of most axSpa** 270 **patients**

271 According to the ASAS20 criteria we obtained 18 non-responders, and selected, from the whole  
272 cohort, 18 responders matched to non-responders by age and gender (one non-responder was  
273 later excluded as it had missing information). Table 1 briefly summarizes the clinical  
274 characteristics of this sub-group of 35 patients included in this study. Responders presented  
275 higher values of C-reactive protein (CRP) ( $p=0.011$ ) and ASDAS-CRP ( $p<0.001$ ) at baseline  
276 (BL). Responders had a higher proportion of HLA-B27 ( $p=0.01$ ), with 83% having the allele  
277 against only 41% of non-responders. Disease activity decreased from baseline to week 14  
278 (w14) in both responders (ASDAS-CRP: from 4.2 at baseline to 1.6 at week 14,  $p=2e-04$ ;  
279 BASDAI: from 6.5 to 1.9,  $p=2e-04$ ) and non-responders (ASDAS-CRP: from 3.2 to 2.5,  $p=5e-04$ ;  
280 BASDAI: from 5.3 to 4.0,  $p=6e-03$ ) (Table 1, Supp. Fig. 1A,B). This suggests that treatment with

281 TNFi, with a few exceptions, has lowered inflammatory markers and disease activity scores in  
282 most patients.

283 **Treatment with adalimumab had a significant impact on the expression of blood cell**  
284 **transcripts and serum proteins of axSpA patients.**

285 Expression levels of blood cell transcripts and abundances of serum proteins in axSpA patients  
286 did not clearly separate responders from non-responders in an unsupervised principal  
287 component analysis (PCA) at neither BL nor at w14 (Fig. 1A). Nonetheless, serum proteomics  
288 showed clear differences between BL and w14 in responders, suggesting an effective impact of  
289 adalimumab treatment. Indeed, a sparse partial least squares discriminant analysis (sPLS-DA)  
290 supports a separation between BL and W14, for both responders and non-responders, not only  
291 in proteomics (Supp. Fig. 2), but also in transcriptomics ( $p < 0.05$ , Fig. 1B). Permutational  
292 multivariate analysis of variance indicates that both time points (3% and 17%) and response  
293 groups (2% and 4%) can explain a small but statistically significant ( $p < 0.05$ ) part of the  
294 observed global variation both in transcript and protein levels, respectively. Moreover, sPLS-DA  
295 analysis supports a separation between responders and non-responders at baseline ( $p < 0.01$ ,  
296 Fig. 1C). This suggests that treatment with TNFi had a significant impact in the expression of  
297 blood cell transcripts and serum proteins of axSpA patients undergoing treatment with  
298 adalimumab. Moreover, it also suggests the existence of detectable differences between  
299 responders and non-responders at baseline.

300 **Blood transcriptome data at baseline suggests that response to adalimumab derived**  
301 **from an interplay between innate and adaptive immunity.**

302 We tested for differences in gene expression or protein abundance between responders and  
303 non-responders at baseline. No proteins (of 112) were found to be significantly differentially  
304 abundant between the two groups at BL (Supp. Table 9), but we could detect 92 (of 18688)

305 genes (12 with FC>2) differentially expressed between responders and non-responders at BL,  
306 with 16 (0 with FC>2) more expressed in responders and 76 (12 with FC>2) more expressed in  
307 non-responders (Fig. 2A, Supp. Table 10). Genes more expressed in responders are associated  
308 with inflammation, such as neutrophil degranulation and interferon signaling, while genes more  
309 expressed in non-responders are associated with lymphocyte activation, namely B-cell activity,  
310 and metabolism, namely translation (Fig. 2B). The top differentially expressed genes are *PAX5*,  
311 *MS4A1* (CD20), *FCRLA*, *BANK1* and *AFF3*, all associated with B-cells and all significantly more  
312 expressed in non-responders at BL (Fig. 2C). Corroborating this observation, estimation of  
313 lymphocyte population frequencies using RNA-Seq indicates significantly higher frequencies of  
314 B-cells in non-responders at BL (Fig. 2D). Genes associated with B-cells show the strongest  
315 overall difference between responders and non-responders at BL. Moreover, there is a  
316 significant positive correlation between disease activity and estimated neutrophil frequencies,  
317 and a negative correlation between disease activity and estimated B- and T- cell frequencies at  
318 BL (Supp. Fig. 7B). Thus, our results suggest that response to adalimumab derives from  
319 alterations in the balance between innate and adaptive immunity, indicating an opposing role  
320 particularly between neutrophils and B-cells.

### 321 **Blood transcriptome data improved ability to differentiate responders versus non-** 322 **responders at baseline**

323 In our cohort, ASDAS-CRP at baseline was significantly ( $p=0.011$ ) associated with response in  
324 a multivariate logistic model of association with TNFi response (Fig. 3A). HLA-B27 status was  
325 also significant ( $p=0.034$ ), while age at diagnosis and disease duration did not reach statistical  
326 significance. ASDAS-CRP was more elevated in responders, with an optimal threshold of 4.15  
327 (100% sensitivity and 50% specificity) when considered in isolation (area under the curve (AUC)  
328 = 0.83, Fig. 5B). A model incorporating simultaneously the clinical parameters ASDAS-CRP and  
329 HLA-B27 reached an AUC of 0.88. Interestingly, a model replacing HLA-B27 with the ratio

330 between neutrophils and total lymphocytes (N/L) achieved an AUC of 0.84, hinting at the  
331 potential for the use of hemogram data as a simple alternative to predict response to treatment.  
332 Finally, we incorporated in our models variables from the transcriptomic data. For this, we chose  
333 the most robustly differentially expressed gene between responders and non-responders at  
334 baseline, which was *AFF3*, a tissue-restricted nuclear transcriptional activator preferentially  
335 expressed in lymphoid tissues. This gene presented the lowest false discovery rate (0.006), and  
336 a fold change of 1.9 (higher in non-responders, Fig. 2A,B). Adding the gene expression values  
337 of *AFF3* to a logistic regression model including ASDAS-CRP increased the AUC to 0.96 (Fig.  
338 3B). If we choose the second most robust differentially expressed gene (*BANK1*), we reach a  
339 similar AUC of 0.94 (not shown). Moreover, a random forest model using ASDAS-CRP, and  
340 *AFF3* achieved a predictive accuracy of 80%, better than using ASDAS-CRP alone (60%) or  
341 only clinical variables ASDAS-CRP and HLA-B27 (70%). Thus, our results suggest that blood  
342 transcriptome data can improve our ability to differentiate responders from non-responders at  
343 baseline, and that simple hemogram data can have valuable clinical application.

#### 344 **Transcripts and proteins varying between baseline and week 14 were associated with a** 345 **decrease in innate immune activity**

346 To assess more concretely the impact of adalimumab treatment, we first looked for differences  
347 in gene expression and protein abundance between BL and w14. In responders, 2120 (of  
348 21438) genes (103 genes with fold change (FC) greater than 2) and 41 (of 129) proteins (7 with  
349 FC>2) were differentially abundant between BL and w14, of which 1096 genes (41 with FC>2)  
350 and 25 proteins (4 with FC>2) were upregulated at w14 (Fig. 4A, Supp. Tables 1,2).

351 In responders, genes associated with inflammation, particularly neutrophil-driven (such as  
352 *DOK3*, *LRG1*, and *MMP9*), tended to be significantly less expressed in blood cells at w14 in  
353 comparison to BL, while upregulated genes were associated mostly with translation and other

354 metabolic processes (eg. *EEF1A1*, *RPL7*, *MRPL1*, Fig. 4B). In agreement with this, serum  
355 proteins less abundant at w14 were associated with the activation of the complement system  
356 and innate immunity, including the complement factors *CFB* and *CFH*, and complement  
357 components *C3*, *C8B* and *C8G* (Fig. 4B, Supp. Table 2). Serum proteins more abundant at w14  
358 were linked with vitamin metabolism, including the apolipoproteins *APOA1*, *APOA2*, and  
359 *APOA4*. Given the consistent decrease in expression of Neutrophil and innate immunity  
360 markers, we also compared estimated frequencies of different white blood cells between BL and  
361 w14. In agreement with the gene expression results, we observe in responders a significant  
362 decrease in neutrophil frequency at week 14, and an increase of B cell frequency (Fig. 4C), with  
363 a similar pattern observed for other adaptive immune cell populations such as CD4+ T-cells  
364 (Supp. Fig. 7A).

365 In non-responders, no significant differences in blood cell gene expression were found between  
366 BL and w14 (Supp. Fig. 3 and Supp. Table 3). Nonetheless, a rank-based gene set enrichment  
367 analysis (GSEA) of the transcriptomics data uncovers the same pathways as in responders  
368 (Supp. Fig. 4). In non-responders, 16 serum proteins were found differentially expressed (none  
369 with  $FC > 2$ ), of which 11 upregulated at w14, including *APOA1*, *CLEC3B*, *CFH* and *RBP4* (Supp.  
370 Table 4). No significant pathways are found in the proteomics data. Also, although there is a  
371 similar tendency to decrease neutrophil frequency between BL and w14 in non-responders, it  
372 does not reach statistical significance in neutrophils nor other immune cell populations (Supp.  
373 Fig. 7A).

374 Genes and proteins differentially abundant between BL and w14 in responders were at more  
375 similar levels between the two patient groups at w14 ( $p < 0.05$ ), suggesting preexisting  
376 differences at baseline that got attenuated due to treatment (Supp. Fig. 5). In agreement with  
377 this observation, we did not find any genes or proteins displaying significantly different behavior  
378 between time and response group, suggesting that the action of adalimumab in responders and



379 non-responders is similar. Overall, these results suggest that transcripts and proteins varying  
380 during adalimumab treatment were associated with a decrease in innate immune activity.

381

382 **Markers of inflammation were already lowered in the serum after 3-5 days of adalimumab**  
383 **treatment, in both responders and non-responders.**

384 To refine our understanding of the temporal response to adalimumab, we performed serum  
385 proteomics analysis also at 3-5 days and 2 weeks after beginning of treatment. In responders,  
386 among the serum proteins significantly downregulated at w14 in comparison to BL, Haptoglobin  
387 (HP), Haptoglobin receptor (HPR) and CRP showed a tendency to decrease already at 3-5  
388 days, further decreasing until 2 weeks (Fig. 5A, Supp. Tables 5,6). These proteins also tended  
389 to decrease in non-responders, particularly in the first two weeks (Supp. Fig. 6A-C, Supp.  
390 Tables 7,8). Another group of proteins (including CFH and CFB) displayed a mild continuous  
391 decrease through time, while genes like C3 and C8A only appeared to decrease noticeably  
392 between week 2 and week 14. Among the proteins significantly increasing in w14 in comparison  
393 with BL in responders, there was greater heterogeneity, but some, including APOD, APOA2 and  
394 PPBP displayed a tendency to increase their abundance already at week 2, including in non-  
395 responders (Fig. 5B, Supp. Fig. 6D). Interestingly, the average level of change of these proteins  
396 was much milder (maximum FC of 2) when compared to HP, HPR and CRP (FC of 3-5). Thus,  
397 our results indicate that some markers of inflammation elevated at baseline were already  
398 lowered in the serum of some patients after just 3-5 days of adalimumab treatment.

399

400 **DISCUSSION**

401 This work documented that adalimumab treatment has a significant effect in transcript  
402 expression and protein abundances during the first 14 weeks of treatment. In our axSpA cohort,  
403 TNFi treatment seems to lower inflammatory markers in most patients, as observed in previous  
404 studies [4] and suggests an interplay between innate and adaptive immunity. Lymphoid markers  
405 such as *AFF3*, and Neutrophil/Lymphocyte ratios, emerge as novel differentiating variables  
406 between groups and enable highly accurate predictive models.

407 The main objective of our study was to identify molecular predictors, at BL, of response to TNFi.  
408 Our results corroborate ASDAS-CRP as an effective measure to decide, as promptly as  
409 possible, about TNFi as a therapeutic option in axSpA. However, the cut-off to predict response  
410 to therapy at baseline with maximum sensitivity is 4.1, representing a very high disease activity.  
411 Therefore, more variables are necessary for an accurate prediction, particularly in cases of  
412 moderate disease activity. Adding HLA-B27 status brought further improvements, while the  
413 addition of other variables (age at disease onset, disease duration) didn't seem to add further  
414 resolution to the model. The observation of an interplay between innate and adaptive immunity,  
415 also reported in previous studies in RA [23], suggest similar mechanisms in both diseases. Our  
416 analysis suggests that the ratios between innate/adaptive immune populations, such as  
417 neutrophils/lymphocyte ratios deserve further exploration as a simple clinical marker with  
418 interest regarding TNFi therapeutic decision. In agreement with this, replacing HLA-B27 with the  
419 ratio of neutrophil frequencies over total lymphocytes at BL enabled an accurate model,  
420 although it didn't seem to improve over HLA-B27. This suggests a potential clinical interest,  
421 particularly when HLA-B27 status is not easily available.

422 At the transcriptional level, our analysis revealed significant differences in several genes related  
423 to B cells (*AFF3*, *CD19*, *MS4A1*, *FCRLA*, *BANK1*, *PAX5*). In fact, the most enriched pathways  
424 were associated with B-cell development and activation (genes less expressed in responders),  
425 and to a lesser extent, neutrophil and inflammatory activity (eg. *RIPK3*, genes more expressed

426 in responders). At the proteomic level, we could not detect any protein consistently different at  
427 baseline between responders and non-responders. One possible reason may be that B cell  
428 proteins are present at too low a level in serum, which combined with the overall heterogeneity  
429 of the samples, made these undetectable in our proteomic analysis. We then used RNA-Seq  
430 data to estimate frequencies of different white blood cell populations that are not provided in the  
431 normal clinical hemogram, such as B-Cells. Our analysis confirmed a higher frequency of  
432 neutrophils, and a lower relative frequency of B cells (and of other adaptive immune  
433 populations) in responders in comparison with non-responders at baseline. Adding *AFF3*, a B-  
434 cell associated gene that was the top differentially expressed gene at BL between responders  
435 and non-responders, in a logistic regression model with ASDAS-CRP, enabled a very accurate  
436 prediction of response to adalimumab (AUC=0.96). A similarly high predictive capacity was  
437 obtained with another B-cell associated gene (*BANK1*) providing further consistency to our  
438 results. Moreover, using the same models with robust machine learning methods including  
439 cross-validation suggests a predictive capacity of over 80% accuracy, an estimate which is likely  
440 to be very conservative given the small size of our cohort.

441 To provide further insights regarding the molecular mechanisms involved in the differential  
442 response to TNFi treatment, we obtained measures of expression for blood transcripts and  
443 serum proteins of axSpA patients during 14 weeks of treatment with adalimumab. Our  
444 transcriptomics and proteomics data indicate that a significant fraction of the observed variation  
445 in gene expression can be explained by treatment time and response status. Moreover,  
446 transcripts and proteins with significantly reduced expression between BL and w14 of treatment  
447 were associated with inflammation and innate immunity, in agreement with the observed  
448 changes in clinical markers of inflammation and scores of disease activity. Taken together, this  
449 suggests the existence of clinically relevant information in the data and the potential to uncover  
450 early biomarkers of TNFi response.

451 Our transcriptomic results are in large agreement with previous results in axSpA. Namely,  
452 *TNFSF14* (LIGHT), *IL17RA*, and *EPOR*, genes reported by Haroon et al. [16], also had  
453 significantly reduced expression after TNFi treatment in our cohort (the gene *IFNAR1* didn't  
454 reach significance in our study but had a borderline adjusted p-value of 0.07). Moreover, 58  
455 (16%) of 360 genes upregulated after TNFi in Wang et al. [17] were also upregulated in our  
456 study, and 88 (31%) of 285 down regulated genes were also detected in our study (with only  
457 one gene showing opposing significant tendencies between the studies). Among the 103  
458 significantly differentially expressed genes (DEGs) between BL and w14 with higher fold  
459 changes ( $FC > 2$ ), ten had been previously identified as axSpA-associated in GWAS [35]. Of  
460 these, *TNFRSF1A*, *TBKBP1*, *HHAT*, and *LTBR*, all less expressed at w14, are involved in the  
461 TNF pathway, mediate apoptosis through nuclear factor- $\kappa$ B, and function as a regulator of  
462 inflammation [36]. Interestingly, *IL1R*, *IL6R* and *TYK2*, more associated with innate immunity,  
463 were downregulated, while *IL7R* and *ICOSLG*, more associated with the adaptive immune  
464 system, namely the stimulation and differentiation of T and B cells, were upregulated. *FCGR2A*,  
465 also downregulated, encodes a cell surface receptor found on phagocytic cells, such as,  
466 macrophages and neutrophils. This indicates that, despite heterogeneity in clinical  
467 manifestations of axSpA, molecular response to TNFi seems consistent between different  
468 studies, at least at the level of the blood cell transcriptome. These results suggest that  
469 biomarkers of TNFi response uncovered in our cohort are likely to be generally applicable in the  
470 axSpA context, although further validation is still mandatory.

471 Our study expands on previous works in the axSpA context by introducing proteomics data,  
472 including intermediate timepoints during adalimumab treatment. We identified several serum  
473 proteins undergoing significant changes in abundance with adalimumab treatment. Overall, we  
474 observe a decrease in the abundances of HP, HPR, CRP and complement factors, and an  
475 increase of several apolipoproteins, CLEC3b and RBP4. Interestingly, in responders, an early

476 (since days 3-5) and persistent decrease of HP and CRP is seen, correlating with observed  
477 clinical improvement. Decrease of complement factors is milder and occurs later (after week 2).  
478 A later increase of apolipoproteins APOA1, APOA2 and APOD, involved in lipid clearance from  
479 circulation and anti-inflammatory properties, has been previously shown [37]. Curiously, APOD  
480 has no marked similarity to other apolipoprotein sequences, but has a high degree of homology  
481 to plasma retinol-binding protein (Rbp), which is also overexpressed, and both are thought to  
482 influence bone metabolism [37,38]. Rbp4 seems to be present in a restricted population of  
483 epiphyseal chondrocytes and perichondrial cells correlating to the future regions of secondary  
484 ossification. In addition, CLEC3B, a plasminogen-binding protein induced during the  
485 mineralization phase of osteogenesis, is also more abundant [39]. These data unravel molecular  
486 mechanisms underlying the abrogation of inflammation, while also suggesting that  
487 osteoproliferation may be induced under TNFi therapy, as documented in recent studies [40–  
488 42]. Future studies should aim to uncover the physiopathological role of these genes in TNFi  
489 response.

490 We acknowledge limitations in our study, namely the need for further validation with targeted  
491 approaches and in new cohorts. Moreover, as all patients were under adalimumab treatment,  
492 we cannot extrapolate the results to other TNFi, although comparison with analysis in RA  
493 suggest that the underlying mechanisms will be similar.

## 494 **CONCLUSIONS**

495 To our knowledge, this study is the first using a multi-omic approach to tackle the difficult  
496 challenge of predicting at BL the therapeutic response to TNFi in the axSpA context. Our results  
497 suggest an interplay between innate and adaptive immunity occurring under TNFi therapy, with  
498 lymphoid markers emerging as the most differentially expressed between groups and enabling  
499 highly accurate predictive models with our cohort. In addition, our work confirms transcriptomics  
500 results of previous studies investigating the effects of TNFi in axSpA and expands them by

501 providing a genome-wide census of both blood cell genes expression and serum proteins  
502 abundances during the first 14 weeks of treatment with Adalimumab, in both responders and  
503 non-responders.

504 Taken together, our results suggest that molecular data can not only provide mechanistic  
505 insights to the genesis and progression of the disease, but also suggest novel biomarkers to  
506 evaluate the potential response to adalimumab before initiating treatment or in its initial phases.

## 507 **DECLARATIONS**

### 508 **Ethics approval and consent to participate:**

509 This study (registered in clinical trials.gov with the identifier NCT02492217) was approved by  
510 the national competent authorities: National Ethics Committee for Clinical Research (CEIC) and  
511 INFARMED (competent authority to regulate medicinal products). The study was conducted  
512 according to Good Clinical Practices (GCP), Declaration of Helsinki, and legal regulation  
513 applicable, ensuring participants' safety and mechanisms for data protection. Written informed  
514 consent was obtained from all participants before study inclusion. None of the patient identifiers  
515 were known to anyone outside of the research group. There was no active involvement of  
516 patients or the public as co-producers of research in this project. However, all participants were  
517 invited to participate in a meeting where the main results were presented and discussed.

### 518 **Availability of data and materials**

519 Transcriptomics and proteomics data are available as supplementary tables in zenodo under  
520 the DOI <https://doi.org/10.5281/zenodo.4914646>. Mass spectrometry data are available through  
521 the ProteomeXchange Consortium via the PRIDE partner repository  
522 (<https://www.ebi.ac.uk/pride/>), under dataset identifiers PXD026189 and  
523 <http://doi.org/10.6019/PXD026189>.

### 524 **Competing Interests:**

525 F.M.P.-S. has received research grants by Abbvie, Janssen, Novartis, and received consulting  
526 fees from AbbVie, Astra Zeneca, Biogen, Celgene, Eli-Lilly, Janssen, Novartis, Pfizer,  
527 Tecnimed, UCB. J.L.-G. received consulting fees from Abbvie, Pfizer. H.S. received consulting  
528 fees from Abbvie, Eli-Lilly, Novartis, Pfizer. J.T.-C. received consulting fees from AbbVie,  
529 AMGEN, Eli-Lilly, Janssen, MSD, Novartis, Pfizer, UCB. M.B. received consulting fees from  
530 Lilly, Janssen and Abbvie. For all authors with potential conflicts of interest, these were not  
531 directly related to this study. The other authors declare that there are no conflicts of interest to  
532 disclose.

533 **Funding**

534 D.S. was funded by a fellowship from Fundação para a Ciência e Tecnologia (PTDC/MED-  
535 ONC/28660/2017). This study was funded by Abbvie but the funder had no influence in study  
536 design, data analysis and writing of the submitted document.

537 **Author's Contributions:**

538 Study concept and design: F.M.P.-S., J.C.B.; Acquisition of clinical data: M.B., P.P., H.S., J.L.-  
539 G., J.T.-C., J.A.P.S., J.M.D., A.B., S.M., J.C.B., F.M.P.-S.; Laboratorial research direction:  
540 A.V.C., F.M.P.-S.; Performance of laboratory experiments: A.S., A.F.F., F.M.P.-S., A.V.C., J.-  
541 C.G., J.A., V.B.; Analysis and interpretation of data: D.S., A.V.C., A.F.F., F.M.P.-S.; Writing of  
542 the manuscript: D.S., A.V.C., A.F.F., F.M.P.-S.; Critical revision of the manuscript for important  
543 intellectual content: All authors.

544 **Acknowledgments**

545 We thank the members of the computational multi-omics group for critical reading of the  
546 document. We acknowledge the careful comments provided by 2 anonymous reviewers in a  
547 previous submission.

548

549 **Abbreviations**

550 **ASAS:** assessment in ankylosing spondylitis

551 **ASDAS:** ankylosing spondylitis disease activity score

552 **AUC:** area under the curve

553 **axSpA:** axial spondyloarthritis

554 **BASDAI:** bath ankylosing spondylitis disease activity index

555 **bDMARD:** biological disease-modifying antirheumatic drugs

556 **BL:** baseline

557 **ESR:** erythrocyte sedimentation rate

558 **FC:** fold change

559 **GSEA:** gene set enrichment analysis

560 **HLA-B27:** human leukocyte antigen B27

561 **MRI:** magnetic resonance imaging



562 **NSAID:** non-steroidal anti-inflammatory drugs

563 **PCA:** principal component analysis

564 **RA:** rheumatoid arthritis

565 **sPLS-DA:** sparse partial least squares discriminant analysis

566 **TNFi:** tumor necrosis factor inhibitor

567 **w14:** week 14

568

## 569 REFERENCES

- 570 1 Rudwaleit M. New approaches to diagnosis and classification of axial and peripheral  
571 spondyloarthritis: *Curr Opin Rheumatol* 2010;22:375–80.  
572 doi:10.1097/BOR.0b013e32833ac5cc
- 573 2 CORPOREA Study Group, Pimentel-Santos FM, Mourão AF, et al. Spectrum of ankylosing  
574 spondylitis in Portugal. Development of BASDAI, BASFI, BASMI and mSASSS reference  
575 centile charts. *Clin Rheumatol* 2012;31:447–54. doi:10.1007/s10067-011-1854-7
- 576 3 van der Heijde D, Ramiro S, Landewé R, et al. 2016 update of the ASAS-EULAR  
577 management recommendations for axial spondyloarthritis. *Ann Rheum Dis* 2017;76:978–91.  
578 doi:10.1136/annrheumdis-2016-210770
- 579 4 Callhoff J, Sieper J, Weiß A, et al. Efficacy of TNF $\alpha$  blockers in patients with ankylosing  
580 spondylitis and non-radiographic axial spondyloarthritis: a meta-analysis. *Ann Rheum Dis*  
581 2015;74:1241–8. doi:10.1136/annrheumdis-2014-205322
- 582 5 Zochling J, Braun J. Management and treatment of ankylosing spondylitis: *Curr Opin*  
583 *Rheumatol* 2005;17:418–25. doi:10.1097/01.bor.0000163194.48723.64
- 584 6 Alazmi M, Sari I, Krishnan B, et al. Profiling Response to Tumor Necrosis Factor Inhibitor  
585 Treatment in Axial Spondyloarthritis. *Arthritis Care Res* 2018;70:1393–9.  
586 doi:10.1002/acr.23465
- 587 7 Chen K, Wei X-Z, Zhu X-D, et al. Whole-blood gene expression profiling in ankylosing  
588 spondylitis identifies novel candidate genes that may contribute to the inflammatory and  
589 tissue-destructive disease aspects. *Cell Immunol* 2013;286:59–64.  
590 doi:10.1016/j.cellimm.2013.10.009
- 591 8 Nell VPK. Benefit of very early referral and very early therapy with disease-modifying anti-  
592 rheumatic drugs in patients with early rheumatoid arthritis. *Rheumatology* 2004;43:906–14.  
593 doi:10.1093/rheumatology/keh199
- 594 9 Robinson PC, Brown MA. The window of opportunity: a relevant concept for axial  
595 spondyloarthritis. *Arthritis Res Ther* 2014;16:109. doi:10.1186/ar4561
- 596 10 Blair HA. Secukinumab: A Review in Ankylosing Spondylitis. *Drugs* 2019;79:433–43.  
597 doi:10.1007/s40265-019-01075-3
- 598 11 Dougados M. Treat to target in axial spondyloarthritis: From its concept to its  
599 implementation. *J Autoimmun* 2020;110:102398. doi:10.1016/j.jaut.2019.102398
- 600 12 Rudwaleit M, Schwarzlose S, Hilgert ES, et al. MRI in predicting a major clinical response to  
601 anti-tumour necrosis factor treatment in ankylosing spondylitis. *Ann Rheum Dis*  
602 2007;67:1276–81. doi:10.1136/ard.2007.073098
- 603 13 Rudwaleit M. Prediction of a major clinical response (BASDAI 50) to tumour necrosis factor  
604 blockers in ankylosing spondylitis. *Ann Rheum Dis* 2004;63:665–70.

- 605 doi:10.1136/ard.2003.016386
- 606 14 Pedersen SJ, Sorensen IJ, Garner P, et al. ASDAS, BASDAI and different treatment  
607 responses and their relation to biomarkers of inflammation, cartilage and bone turnover in  
608 patients with axial spondyloarthritis treated with TNF inhibitors. *Ann Rheum Dis*  
609 2011;70:1375–81. doi:10.1136/ard.2010.138883
- 610 15 Turina MC, Yeremenko N, Paramarta JE, et al. Calprotectin (S100A8/9) as serum biomarker  
611 for clinical response in proof-of-concept trials in axial and peripheral spondyloarthritis.  
612 *Arthritis Res Ther* 2014;16:413. doi:10.1186/s13075-014-0413-4
- 613 16 Haroon N, Tsui FWL, O’Shea FD, et al. From gene expression to serum proteins: biomarker  
614 discovery in ankylosing spondylitis. *Ann Rheum Dis* 2010;69:297–300.  
615 doi:10.1136/ard.2008.102277
- 616 17 Wang XB, Ellis JJ, Pennisi DJ, et al. Transcriptome analysis of ankylosing spondylitis  
617 patients before and after TNF- $\alpha$  inhibitor therapy reveals the pathways affected. *Genes*  
618 *Immun* 2017;18:184–90. doi:10.1038/gene.2017.19
- 619 18 Menegatti S, Bianchi E, Rogge L. Anti-TNF Therapy in Spondyloarthritis and Related  
620 Diseases, Impact on the Immune System and Prediction of Treatment Responses. *Front*  
621 *Immunol* 2019;10:382. doi:10.3389/fimmu.2019.00382
- 622 19 Tanino M, Matoba R, Nakamura S, et al. Prediction of efficacy of anti-TNF biologic agent,  
623 infliximab, for rheumatoid arthritis patients using a comprehensive transcriptome analysis of  
624 white blood cells. *Biochem Biophys Res Commun* 2009;387:261–5.  
625 doi:10.1016/j.bbrc.2009.06.149
- 626 20 Stuhlmüller B, Häupl T, Hernandez MM, et al. CD11c as a Transcriptional Biomarker to  
627 Predict Response to Anti-TNF Monotherapy With Adalimumab in Patients With Rheumatoid  
628 Arthritis. *Clin Pharmacol Ther* 2010;87:311–21. doi:10.1038/clpt.2009.244
- 629 21 Thomson TM, Lescarbeau RM, Drubin DA, et al. Blood-based identification of non-  
630 responders to anti-TNF therapy in rheumatoid arthritis. *BMC Med Genomics* 2015;8:26.  
631 doi:10.1186/s12920-015-0100-6
- 632 22 Oswald M, Curran ME, Lamberth SL, et al. Modular Analysis of Peripheral Blood Gene  
633 Expression in Rheumatoid Arthritis Captures Reproducible Gene Expression Changes in  
634 Tumor Necrosis Factor Responders. *Arthritis Rheumatol* 2015;67:344–51.  
635 doi:10.1002/art.38947
- 636 23 Farutin V, Prod’homme T, McConnell K, et al. Molecular profiling of rheumatoid arthritis  
637 patients reveals an association between innate and adaptive cell populations and response  
638 to anti-tumor necrosis factor. *Arthritis Res Ther* 2019;21:216. doi:10.1186/s13075-019-  
639 1999-3
- 640 24 Rudwaleit M, van der Heijde D, Landewe R, et al. The development of Assessment of  
641 SpondyloArthritis international Society classification criteria for axial spondyloarthritis (part  
642 II): validation and final selection. *Ann Rheum Dis* 2009;68:777–83.  
643 doi:10.1136/ard.2009.108233
- 644 25 Machado P, Cerqueira M, Ávila-Ribeiro P, et al. Portuguese recommendations for the use of  
645 biological therapies in patients with axial spondyloarthritis - 2016 update. *Acta Reumatol*  
646 *Port* 2017;42:209–18.
- 647 26 Anderson JJ, Baron G, van der Heijde D, et al. Ankylosing spondylitis assessment group  
648 preliminary definition of short-term improvement in ankylosing spondylitis. *Arthritis Rheum*  
649 2001;44:1876–86. doi:10.1002/1529-0131(200108)44:8<1876::AID-ART326>3.0.CO;2-F
- 650 27 Brandt J. Development and preselection of criteria for short term improvement after anti-  
651 TNF treatment in ankylosing spondylitis. *Ann Rheum Dis* 2004;63:1438–44.  
652 doi:10.1136/ard.2003.016717
- 653 28 Kruhøffer M, Dyrskjøt L, Voss T, et al. Isolation of Microarray-Grade Total RNA, MicroRNA,  
654 and DNA from a Single PAXgene Blood RNA Tube. *J Mol Diagn* 2007;9:452–8.  
655 doi:10.2353/jmol dx.2007.060175

- 656 29 Westphal M, Frankhouser D, Sonzone C, et al. SMaSH: Sample matching using SNPs in  
657 humans. *BMC Genomics* 2019;20:1001. doi:10.1186/s12864-019-6332-7
- 658 30 Chen B, Khodadoust MS, Liu CL, et al. Profiling Tumor Infiltrating Immune Cells with  
659 CIBERSORT. In: von Stechow L, ed. *Cancer Systems Biology*. New York, NY: : Springer  
660 New York 2018. 243–59. doi:10.1007/978-1-4939-7493-1\_12
- 661 31 Abbas AR, Wolslegel K, Seshasayee D, et al. Deconvolution of Blood Microarray Data  
662 Identifies Cellular Activation Patterns in Systemic Lupus Erythematosus. *PLoS ONE*  
663 2009;4:e6098. doi:10.1371/journal.pone.0006098
- 664 32 Yaari G, Bolen CR, Thakar J, et al. Quantitative set analysis for gene expression: a method  
665 to quantify gene set differential expression including gene-gene correlations. *Nucleic Acids*  
666 *Res* 2013;41:e170. doi:10.1093/nar/gkt660
- 667 33 Lewis MJ, Barnes MR, Blighe K, et al. Molecular Portraits of Early Rheumatoid Arthritis  
668 Identify Clinical and Treatment Response Phenotypes. *Cell Rep* 2019;28:2455-2470.e5.  
669 doi:10.1016/j.celrep.2019.07.091
- 670 34 Klein G, Mathé C, Biola-Clier M, et al. RNA-binding proteins are a major target of silica  
671 nanoparticles in cell extracts. *Nanotoxicology* 2016;10:1555–64.  
672 doi:10.1080/17435390.2016.1244299
- 673 35 The Australo-Anglo-American Spondyloarthritis Consortium (TASC). Genome-wide  
674 association study of ankylosing spondylitis identifies non-MHC susceptibility loci. *Nat Genet*  
675 2010;42:123–7. doi:10.1038/ng.513
- 676 36 Hacker H, Karin M. Regulation and Function of IKK and IKK-Related Kinases. *Sci STKE*  
677 2006;2006:re13–re13. doi:10.1126/stke.3572006re13
- 678 37 White CR, Garber DW, Anantharamaiah GM. Anti-inflammatory and cholesterol-reducing  
679 properties of apolipoprotein mimetics: a review. *J Lipid Res* 2014;55:2007–21.  
680 doi:10.1194/jlr.R051367
- 681 38 Martineau C, Najyb O, Signor C, et al. Apolipoprotein D deficiency is associated to high  
682 bone turnover, low bone mass and impaired osteoblastic function in aged female mice.  
683 *Metabolism* 2016;65:1247–58. doi:10.1016/j.metabol.2016.05.007
- 684 39 Wewer UM, Ibaraki K, Schjørring P, et al. A potential role for tetranectin in mineralization  
685 during osteogenesis. *J Cell Biol* 1994;127:1767–75. doi:10.1083/jcb.127.6.1767
- 686 40 Bruijnen STG, Verweij NJF, van Duivenvoorde LM, et al. Bone formation in ankylosing  
687 spondylitis during anti-tumour necrosis factor therapy imaged by 18F-fluoride positron  
688 emission tomography. *Rheumatology* 2018;57:631–8. doi:10.1093/rheumatology/kex448
- 689 41 Gulyás K, Horváth Á, Végh E, et al. Effects of 1-year anti-TNF- $\alpha$  therapies on bone mineral  
690 density and bone biomarkers in rheumatoid arthritis and ankylosing spondylitis. *Clin*  
691 *Rheumatol* 2020;39:167–75. doi:10.1007/s10067-019-04771-3
- 692 42 Boers N, Michielsens CAJ, van der Heijde D, et al. The effect of tumour necrosis factor  
693 inhibitors on radiographic progression in axial spondyloarthritis: a systematic literature  
694 review. *Rheumatology* 2019;58:1907–22. doi:10.1093/rheumatology/kez363
- 695 43 Bray NL, Pimentel H, Melsted P, et al. Near-optimal probabilistic RNA-seq quantification.  
696 *Nat Biotechnol* 2016;34:525–7. doi:10.1038/nbt.3519
- 697 44 Robinson MD, Oshlack A. A scaling normalization method for differential expression  
698 analysis of RNA-seq data. *Genome Biol* 2010;11:R25. doi:10.1186/gb-2010-11-3-r25
- 699 45 Ritchie ME, Phipson B, Wu D, et al. limma powers differential expression analyses for RNA-  
700 sequencing and microarray studies. *Nucleic Acids Res* 2015;43:e47–e47.  
701 doi:10.1093/nar/gkv007
- 702 46 Hartmann EM, Allain F, Gaillard J-C, et al. Taking the shortcut for high-throughput shotgun  
703 proteomic analysis of bacteria. *Methods Mol Biol Clifton NJ* 2014;1197:275–85.  
704 doi:10.1007/978-1-4939-1261-2\_16
- 705 47 Washburn MP, Wolters D, Yates JR. Large-scale analysis of the yeast proteome by  
706 multidimensional protein identification technology. *Nat Biotechnol* 2001;19:242–7.

707 doi:10.1038/85686  
708 48 Liu H, Sadygov RG, Yates JR. A model for random sampling and estimation of relative  
709 protein abundance in shotgun proteomics. *Anal Chem* 2004;76:4193–201.  
710 doi:10.1021/ac0498563

## 711 **Figure Legends**

712 **Figure 1: Response to TNFi has a significant impact on the relative abundance of blood**  
713 **cells transcripts and serum proteins of patients. A)** Principal Component Analysis (PCA) of  
714 the blood cell transcriptomics and proteomics data for responders (R) and non-responders (NL)  
715 at baseline (BL) and week 14 (W14). For visual clarity two outliers are out of view in the  
716 transcriptomics PCA, but all data was used to generate the plot; **B)** Sparse partial least squares  
717 discriminant analysis (sPLS-DA) of transcriptomics data, using time as a variable of interest, in  
718 responders (AUC=0.99, permutation test  $p=8e-07$ ) and non-responders (AUC=1,  $p=6.4e-07$ ); **C)**  
719 sPLS-DA of transcriptomics (AUC=1,  $p=9.6e-07$ ) and proteomics (AUC=1,  $p=3.4e-05$ ) data at  
720 baseline, using response group as a variable of interest. In all cases, AUC and p-value  
721 correspond to the two best components of the sPLS-DA. In all graphs, ellipses represent 95%  
722 confidence intervals.

723 **Figure 2: Blood transcriptome data at baseline suggests response to adalimumab**  
724 **derives from an interplay between innate and adaptive immunity. A)** Volcano plot ( $\log_2$  of  
725 the fold change versus  $-\log_{10}$  of the false discovery rate (FDR)) comparing the transcriptomics  
726 responder versus non-responder samples at baseline (Supp. Table 10); **B)** Barplot displaying  
727 the Normalized Enrichment Score (NES) of representative significant pathways resulting from a  
728 gene set enrichment analysis (GSEA) comparing the gene expression of responder versus non-  
729 responder samples at baseline; **C)** Heatmap representation of the expression profile of the top  
730 40 differentially expressed genes comparing responder versus non-responder samples at  
731 baseline; for visualization purposes, expression values of each gene were scaled towards a  
732 standard distribution (z-score); rows and columns were clustered by correlation; **D)** Estimated B-  
733 cell and Neutrophil frequencies in responder and non-responder samples at baseline;

734 **Figure 3: Blood transcriptome data improves ability to differentiate responders versus**  
735 **non-responders at baseline. A)** Forest plot displaying the logarithm of the odds, 95%  
736 confidence interval and p-value of response to adalimumab for different variables from a logistic  
737 regression model. **B)** Receiver operating characteristic (ROC) curve displaying specificity and  
738 sensitivity for different logistic regression models incorporating: only ASDAS-CRP scores (Area  
739 Under the Curve - AUC=0.83); ASDAS-CRP scores and HLA-B27 status (AUC=0.88); ASDAS-  
740 CRP scores and the ratio between the estimated frequency of neutrophils and total lymphocytes  
741 (N/L, AUC=0.84); ASDAS-CRP and the normalized expression value of *AFF3* (AUC=0.96).

742 **Figure 4: Transcripts and proteins varying between baseline and week 14 were**  
743 **associated with a decrease in innate immune activity. A)** Volcano plot ( $\log_2$  of the fold  
744 change versus  $-\log_{10}$  of the false discovery rate (FDR)) comparing the blood cell  
745 transcriptomics (Supp. Table 1) and serum proteomics (Supp. Table 2) baseline samples versus  
746 week 14 samples in responders; non-significant (NS) genes/proteins are in grey; in green  
747 genes/proteins that are not statistically significant ( $FDR>0.05$ ) but have an estimated fold

748 change greater than 2; in blue genes/proteins that are statistically significant but have a milder  
749 fold change (less than 2); in red genes/proteins that are statistically significant and have a fold  
750 change greater than 2. All red proteins and some of the red gene names are displayed in the  
751 plot. **B)** Barplot displaying the Normalized Enrichment Score (NES) of representative significant  
752 pathways resulting from a gene set enrichment analysis (GSEA) comparing the gene  
753 expression or protein abundances of w14 (green) against BL (blue) responder samples; **C)**  
754 Boxplot displaying estimated Neutrophil or naive B-cell frequencies in BL and w14 samples. In  
755 C the p-value is from a paired Wilcoxon rank-sum test; Samples of the same patient are  
756 connected with a grey line.

757 **Figure 5: Markers of inflammation are already lowered in the serum after 3-5 days of**  
758 **adalimumab treatment, in both responders and non-responders. A)** Log2 fold change of  
759 proteins between a given time point and the baseline. Only proteins significantly downregulated  
760 at w14 in responders were represented. **B)** Same as A but with upregulated proteins. We  
761 clustered proteins with similar temporal behavior using the dtwclust R package. Only the names  
762 of a set of representative proteins are displayed.

763 **Table 1. Summary of the clinical characteristics of the cohort.** For each continuous variable,  
764 the mean and standard deviation within each group were calculated. Two sample Wilcoxon  
765 tests (continuous variables) and chi-square tests of association (categorical variables) were  
766 used to compare characteristics between “Responders” and “Non-Responders”. Variables  
767 include Erythrocyte Sedimentation Rate (ESR, in mm / h), C-Reactive Protein (CRP, in mg / L),  
768 Bath Ankylosing Spondylitis Disease Activity Index (BASDAI) scores, Bath Ankylosing  
769 Spondylitis Functional Index (BASFI) scores, Ankylosing Spondylitis Disease Activity Score  
770 (ASDAS) using the ESR levels (ASDAS-ESR) or CRP levels (ASDAS-CRP). For these  
771 characteristics, the value at baseline and week 14 is provided, as well as the difference between  
772 the two endpoints. Other fixed clinical characteristics include age at diagnosis (in years of age),  
773 disease duration (in years since start of first symptoms), presence (Positive) or absence  
774 (Negative) of the HLA-B27 allele, and sex (biological gender) – Female or Male.

775



Figure 1

Group: ● BL NR ● BL R ● W14 NR ● W14 R

**A** medRxiv preprint doi: <https://doi.org/10.1101/2022.08.02.22278314>; this version posted August 3, 2022. The copyright holder for this preprint (which was not certified by peer review) is the author/funder, who has granted medRxiv a license to display the preprint in perpetuity. It is made available under aCC-BY-NC-ND 4.0 International license.

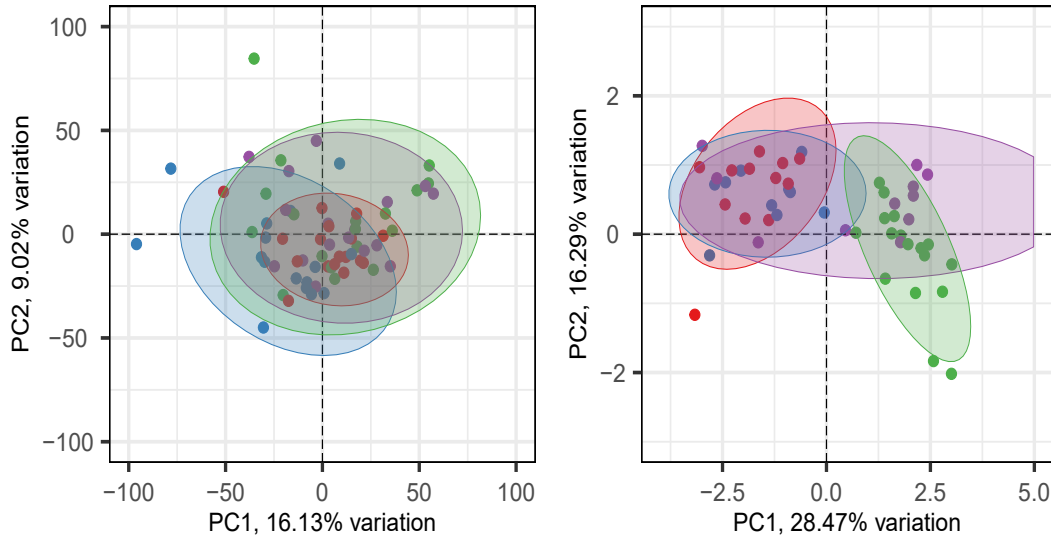

**B** Transcriptomics: Baseline versus Week 14

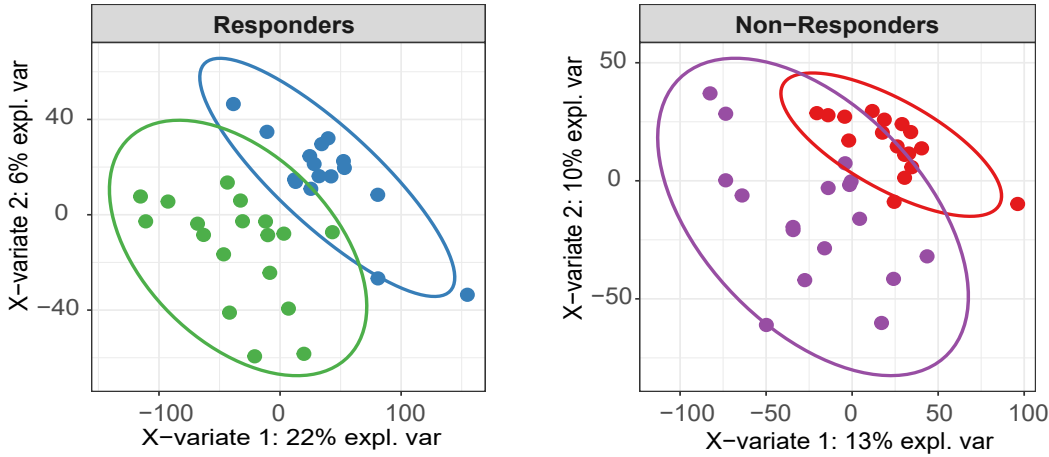

**C** Responders versus Non-Responders at Baseline

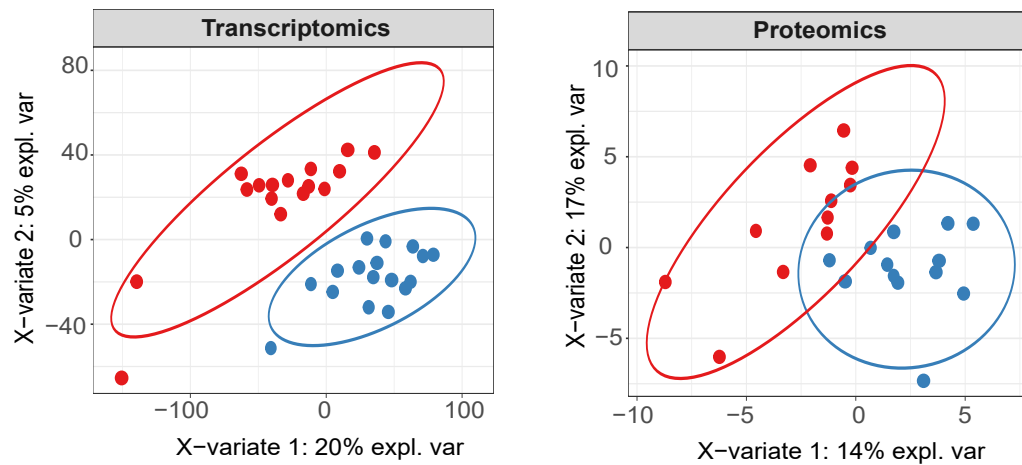

Figure 2

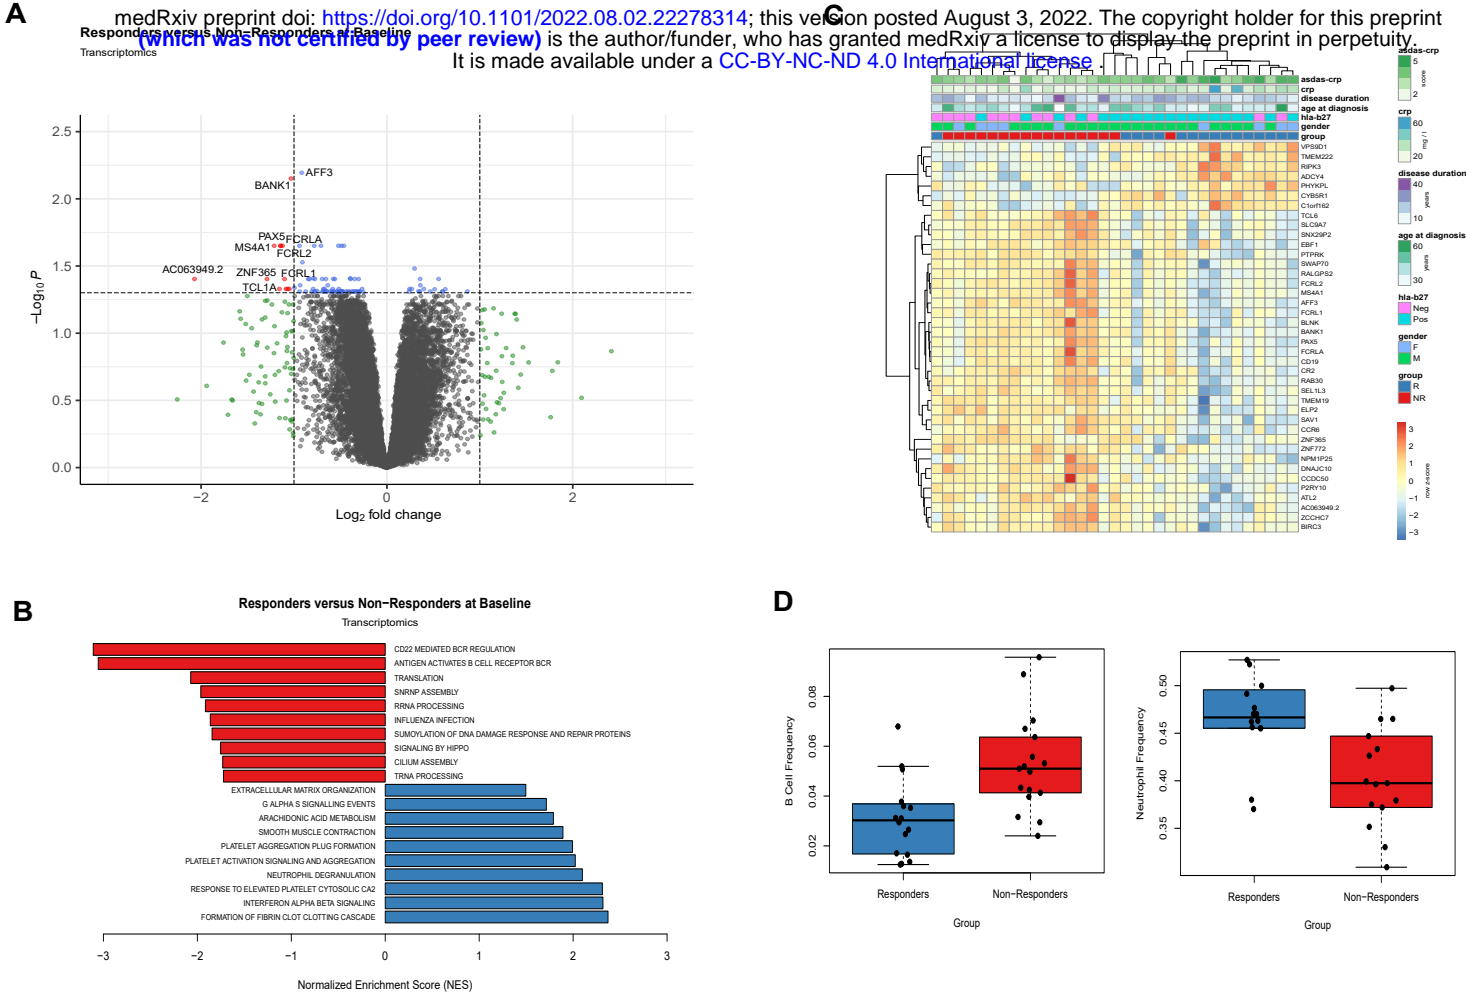



Figure 3

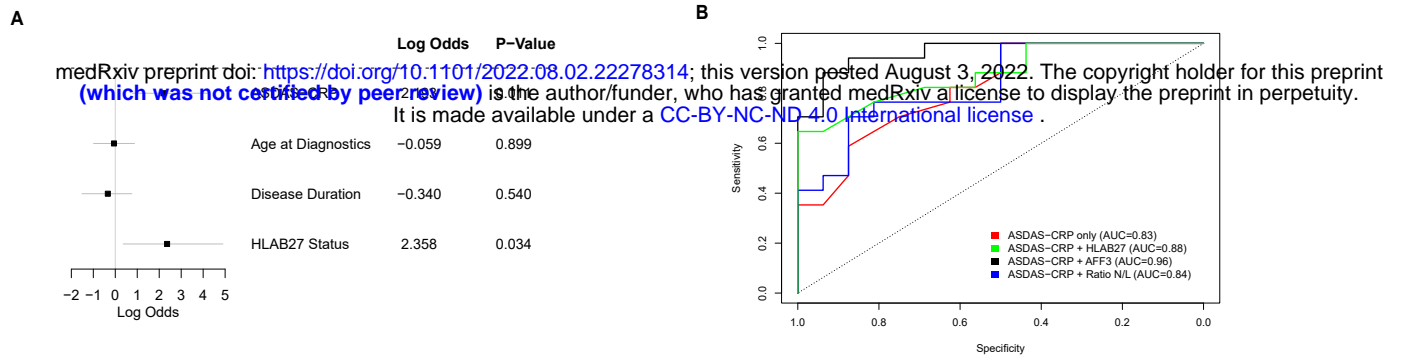

Figure 4

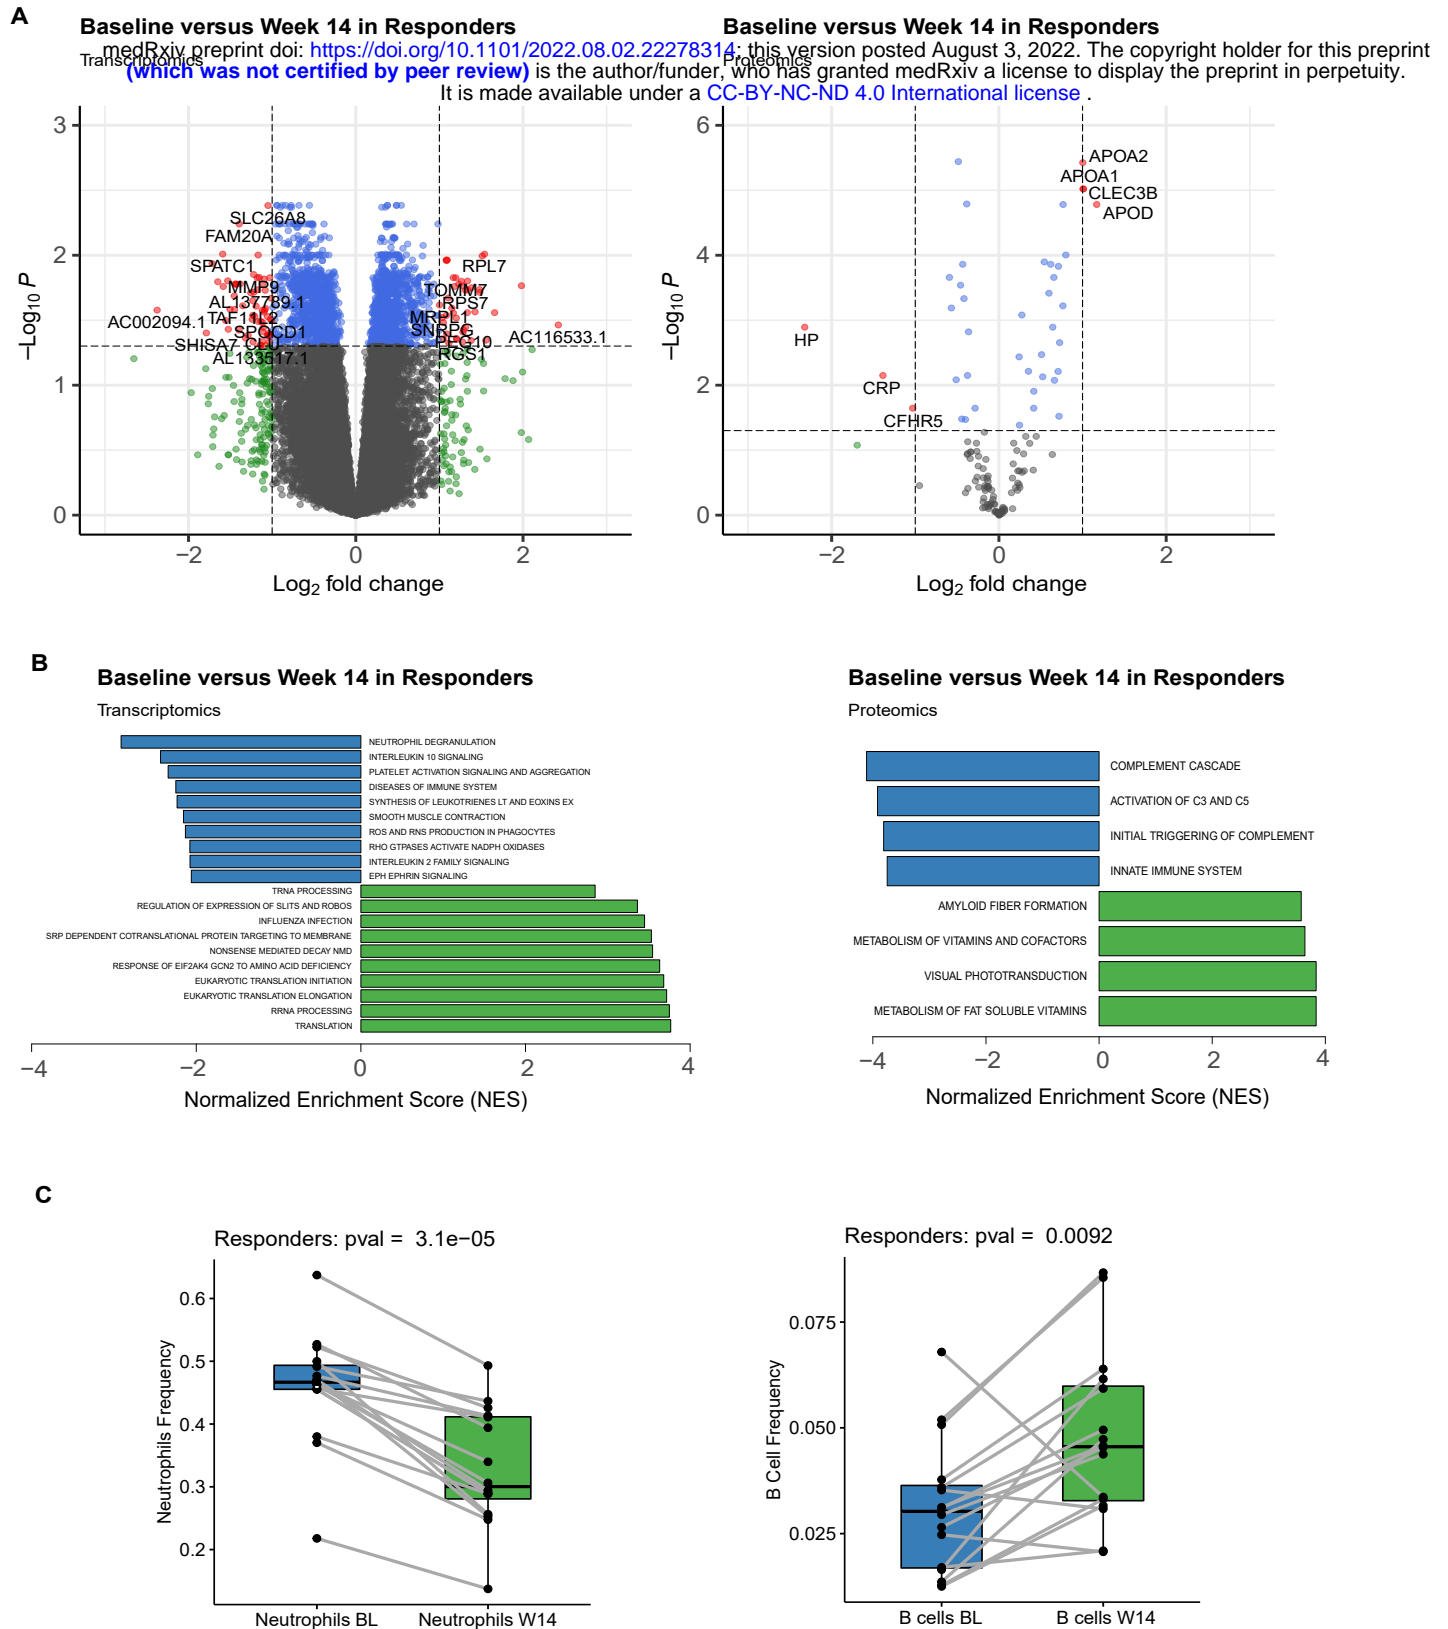

Figure 5

A medRxiv preprint doi: <https://doi.org/10.1101/2022.08.02.22278314>; this version posted August 3, 2022. The copyright holder for this preprint (which was not certified by peer review) is the author/funder, who has granted medRxiv a license to display the preprint in perpetuity. It is made available under a [CC-BY-NC-ND 4.0 International license](https://creativecommons.org/licenses/by-nc-nd/4.0/).

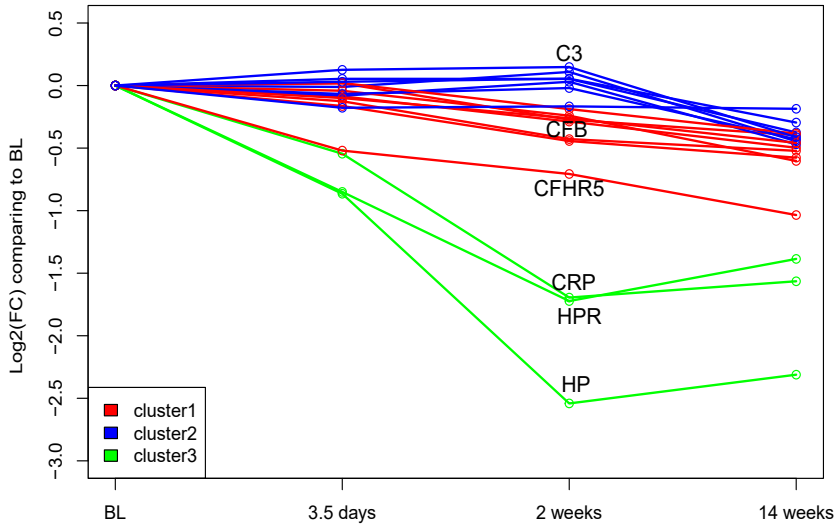

B Temporal evolution of upregulated plasma proteins

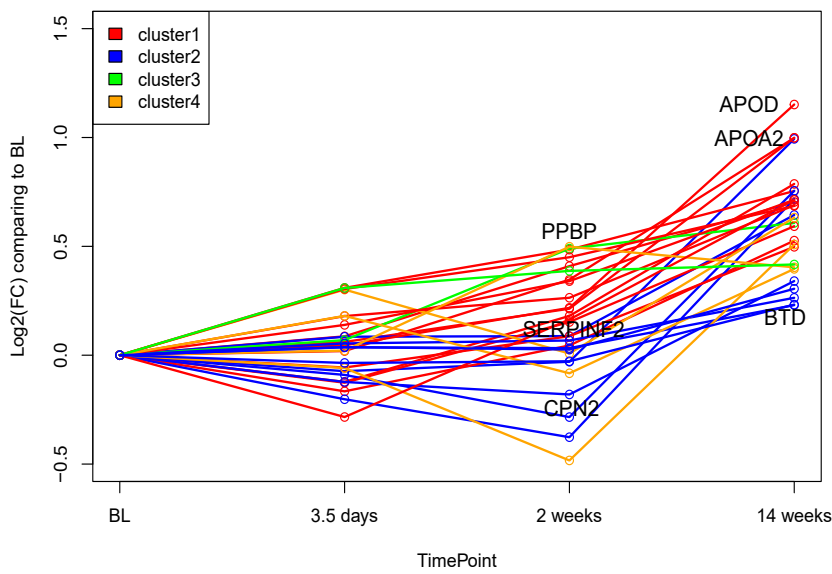

**Table 1**

medRxiv preprint doi: <https://doi.org/10.1101/2022.08.02.22278314>; this version posted August 3, 2022. The copyright holder for this preprint (which was not certified by peer review) is the author/funder, who has granted medRxiv a license to display the preprint in perpetuity. It is made available under a [CC-BY-NC-ND 4.0 International license](https://creativecommons.org/licenses/by-nc-nd/4.0/).

|                                                | NP (N=17)<br>Mean (sd) | S (N=18)<br>Mean (sd) | p value |
|------------------------------------------------|------------------------|-----------------------|---------|
| <b>Erythrocyte Sedimentation Rate (mm / h)</b> |                        |                       |         |
| Baseline                                       | 26.059 (20.355)        | 33.167 (28.461)       | 0.541   |
| Week 14                                        | 11.882 (10.741)        | 10.833 (9.102)        | 0.856   |
| BL - W14                                       | 14.176 (16.253)        | 22.333 (23.450)       | 0.298   |
| <b>C-Reactive Protein (mg / L)</b>             |                        |                       |         |
| Baseline                                       | 11.312 (11.507)        | 23.692 (19.678)       | 0.011   |
| Week 14                                        | 7.418 (10.882)         | 3.896 (2.776)         | 0.754   |
| BL - W14                                       | 3.894 (4.781)          | 19.796 (19.375)       | < 0.001 |
| <b>BASDAI score</b>                            |                        |                       |         |
| Baseline                                       | 5.347 (2.629)          | 6.528 (1.463)         | 0.234   |
| Week 14                                        | 4.065 (2.181)          | 1.928 (1.443)         | 0.003   |
| BL - W14                                       | 1.282 (1.502)          | 4.600 (1.814)         | < 0.001 |
| <b>BASFI score</b>                             |                        |                       |         |
| Baseline                                       | 5.291 (2.717)          | 6.709 (1.906)         | 0.156   |
| Week 14                                        | 3.712 (2.653)          | 2.548 (2.097)         | 0.176   |
| BL - W14                                       | 1.578 (1.490)          | 4.161 (2.064)         | < 0.001 |
| <b>ASDAS-ESR score</b>                         |                        |                       |         |
| Baseline                                       | 3.229 (0.861)          | 3.761 (1.083)         | 0.203   |
| Week 14                                        | 2.271 (0.929)          | 1.478 (0.498)         | 0.008   |
| BL - W14                                       | 0.959 (0.566)          | 2.283 (1.004)         | < 0.001 |
| <b>ASDAS-CRP score</b>                         |                        |                       |         |
| Baseline                                       | 3.159 (0.748)          | 4.156 (0.756)         | < 0.001 |
| Week 14                                        | 2.459 (0.753)          | 1.561 (0.572)         | < 0.001 |
| BL - W14                                       | 0.700 (0.507)          | 2.594 (0.940)         | < 0.001 |
| <b>Age at Diagnosis (years)</b>                |                        |                       |         |
|                                                | 37.862 (11.279)        | 34.851 (11.635)       | 0.301   |
| <b>Disease duration (years)</b>                |                        |                       |         |
|                                                | 14.822 (12.742)        | 13.718 (7.494)        | 0.869   |
| <b>HLA-B27 Status</b>                          |                        |                       |         |
|                                                |                        |                       | 0.010   |
| Negative                                       | 10 (58.8%)             | 3 (16.7%)             |         |
| Positive                                       | 7 (41.2%)              | 15 (83.3%)            |         |
| <b>Gender</b>                                  |                        |                       |         |
|                                                |                        |                       | 0.915   |
| Female                                         | 5 (29.4%)              | 5 (27.8%)             |         |
| Male                                           | 12 (70.6%)             | 13 (72.2%)            |         |
