# Supplementary material for: MULTI-OMICS TEMPORAL PROFILING OF AXIAL SPONDYLOARTHRITIS PATIENTS REVEALS AN ASSOCIATION OF THERAPEUTIC RESPONSE TO ADALIMUMAB WITH DISEASE ACTIVITY AND INNATE / ADAPTIVE IMMUNITY
Source: bioRxiv or medRxiv preprint supplement (doi:10.1101/2022.08.02.22278314), 2022-08-03

### Baseline versus Week 14 in Non-Responders

Transcriptomics

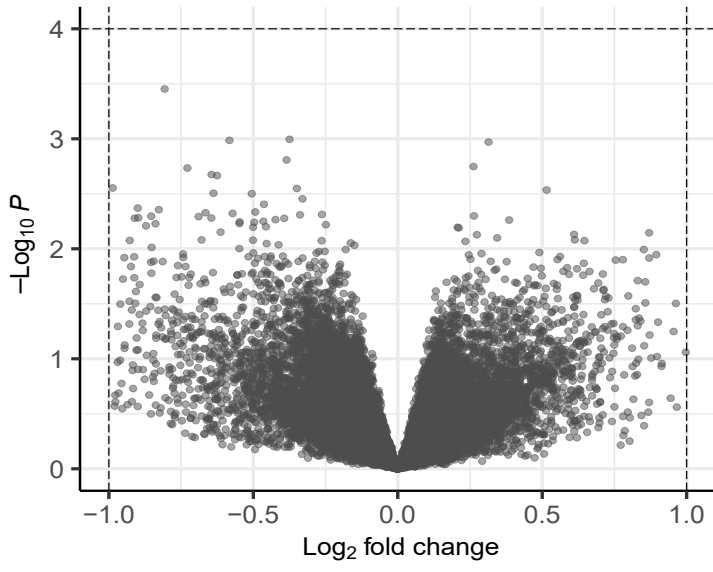

### Baseline versus Week 14 in Non-Responders

Proteomics

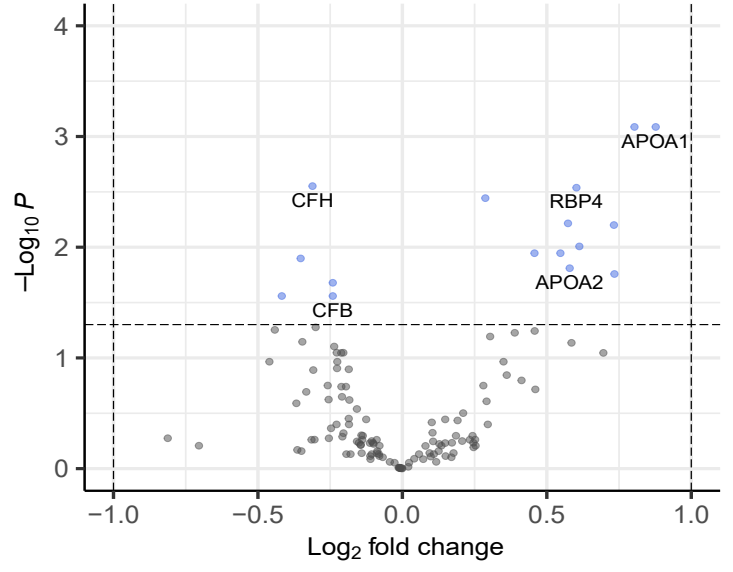

Supplement: Supplementary file [file media-4.pdf]
